# Supplementary material for: Comprehensive Evaluation of Odor-Causing VOCs from the Painting Process of the Automobile Manufacturing Industry and Its Sustainable Management
Source: MDPI journal article supplement (doi:10.3390/atmos13091515), 2022-09-16
Supplement: s1 [file s1]

Archive with 1 entries (1 files):
- atmosphere-1894885-supplementary.pdf
