# Supplementary material for: Comprehensive Evaluation of Odor-Causing VOCs from the Painting Process of the Automobile Manufacturing Industry and Its Sustainable Management
Source: MDPI journal article supplement (doi:10.3390/atmos13091515), 2022-09-16
Supplement: s1 [file s1 › atmosphere-1894885-supplementary.pdf]

# Comprehensive Evaluation of Odor-Causing VOCs from the Painting Process of the Automobile Manufacturing Industry and Its Sustainable Management

Vanitchaya Kultan <sup>1,2</sup>, Sarawut Thepanondh <sup>1,2,\*</sup>, Nattaporn Pinthong <sup>1,2</sup>, Jutarat Keawboonchu <sup>1,2</sup> and Mark Robson <sup>3</sup>

<sup>1</sup> Department of Sanitary Engineering, Faculty of Public Health, Mahidol University, Bangkok 10400 Thailand

<sup>2</sup> Center of Excellence on Environmental Health and Toxicology (EHT), Bangkok 10400 Thailand

<sup>3</sup> School of Environmental and Biological Sciences, Department of Plant Biology, The State University of New Jersey, New Brunswick, NJ 08901-8525, USA

\* Correspondence: sarawut.the@mahidol.ac.th; Tel.: +66--2354-8540

**Table S1.** VOCs emissions from each unit of the wastewater treatment system.

| No. | Unit name      | Methyl Ethyl Ketone     |                          |          | Methyl Isobutyl Ketone  |                          |          |
|-----|----------------|-------------------------|--------------------------|----------|-------------------------|--------------------------|----------|
|     |                | Air emission rate (g/s) | Total emission (Mg/year) | Per-cent | Air emission rate (g/s) | Total emission (Mg/year) | Per-cent |
| 0   | Drop from pipe | $5.69 \times 10^{-4}$   | $1.79 \times 10^{-2}$    | 2.3      | $2.79 \times 10^{-3}$   | $8.80 \times 10^{-2}$    | 9.2      |
| 1   | RW             | $7.75 \times 10^{-3}$   | $2.44 \times 10^{-1}$    | 30.7     | $1.03 \times 10^{-2}$   | $3.25 \times 10^{-1}$    | 34.1     |
| 2   | PA_1           | $4.26 \times 10^{-3}$   | $1.34 \times 10^{-1}$    | 16.9     | $8.08 \times 10^{-3}$   | $2.55 \times 10^{-1}$    | 26.8     |
| 3   | RA             | $3.64 \times 10^{-3}$   | $1.15 \times 10^{-1}$    | 14.4     | $3.64 \times 10^{-3}$   | $1.15 \times 10^{-1}$    | 12.1     |
| 4   | FC             | $3.10 \times 10^{-3}$   | $9.78 \times 10^{-2}$    | 12.3     | $1.64 \times 10^{-3}$   | $5.18 \times 10^{-2}$    | 5.4      |
| 5   | SD_1           | $1.28 \times 10^{-3}$   | $4.02 \times 10^{-2}$    | 5.1      | $1.42 \times 10^{-4}$   | $4.47 \times 10^{-3}$    | 0.5      |
| 6   | HD_1           | $1.50 \times 10^{-3}$   | $4.73 \times 10^{-2}$    | 5.9      | $1.10 \times 10^{-3}$   | $3.15 \times 10^{-2}$    | 3.6      |
| 7   | PA_2           | $1.60 \times 10^{-3}$   | $5.04 \times 10^{-2}$    | 5.0      | $1.10 \times 10^{-3}$   | $3.45 \times 10^{-2}$    | 3.5      |
| 8   | AR             | $1.05 \times 10^{-3}$   | $3.32 \times 10^{-2}$    | 4.2      | $2.85 \times 10^{-4}$   | $8.99 \times 10^{-3}$    | 0.9      |
| 9   | SD_2           | $3.40 \times 10^{-5}$   | $1.07 \times 10^{-3}$    | 0.1      | $5.44 \times 10^{-6}$   | $1.72 \times 10^{-4}$    | 0.1      |
| 10  | HD_2           | $3.24 \times 10^{-5}$   | $1.02 \times 10^{-3}$    | 0.1      | $4.98 \times 10^{-6}$   | $1.57 \times 10^{-4}$    | 0.1      |
| 11  | FN             | $6.50 \times 10^{-4}$   | $2.05 \times 10^{-2}$    | 2.6      | $5.30 \times 10^{-5}$   | $1.67 \times 10^{-3}$    | 0.2      |
| 12  | ST             | $1.00 \times 10^{-4}$   | $3.15 \times 10^{-3}$    | 0.4      | $8.95 \times 10^{-6}$   | $2.82 \times 10^{-4}$    | 0.1      |

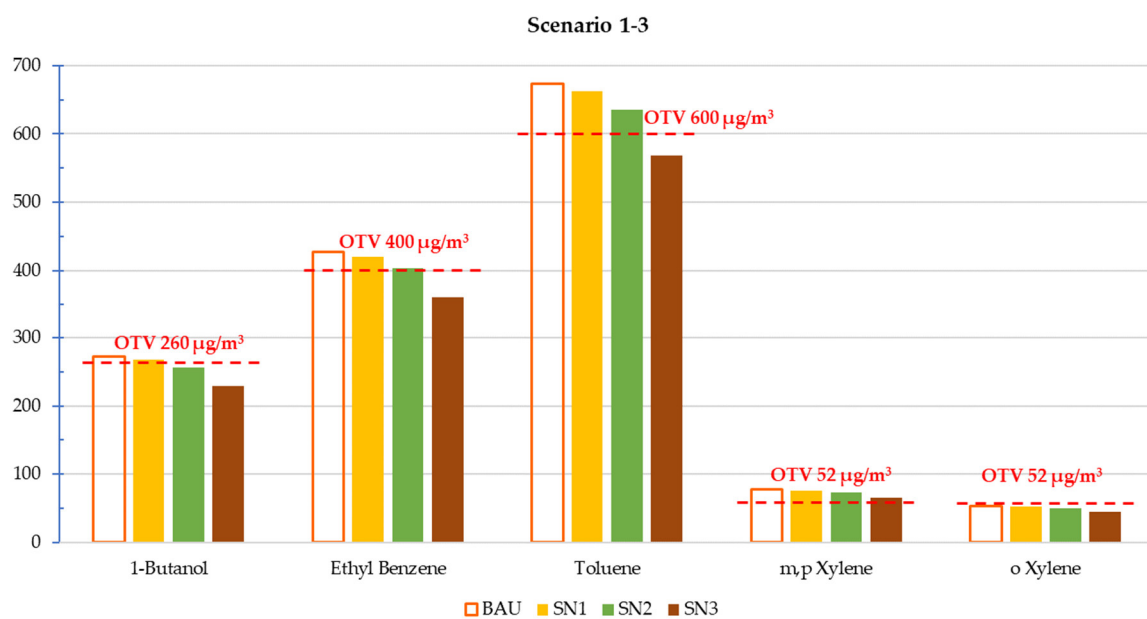

**Figure S1.** Peak concentration of target chemicals at the maximum ground level concentration (MGLC) after modification for Scenario 1 – 3.

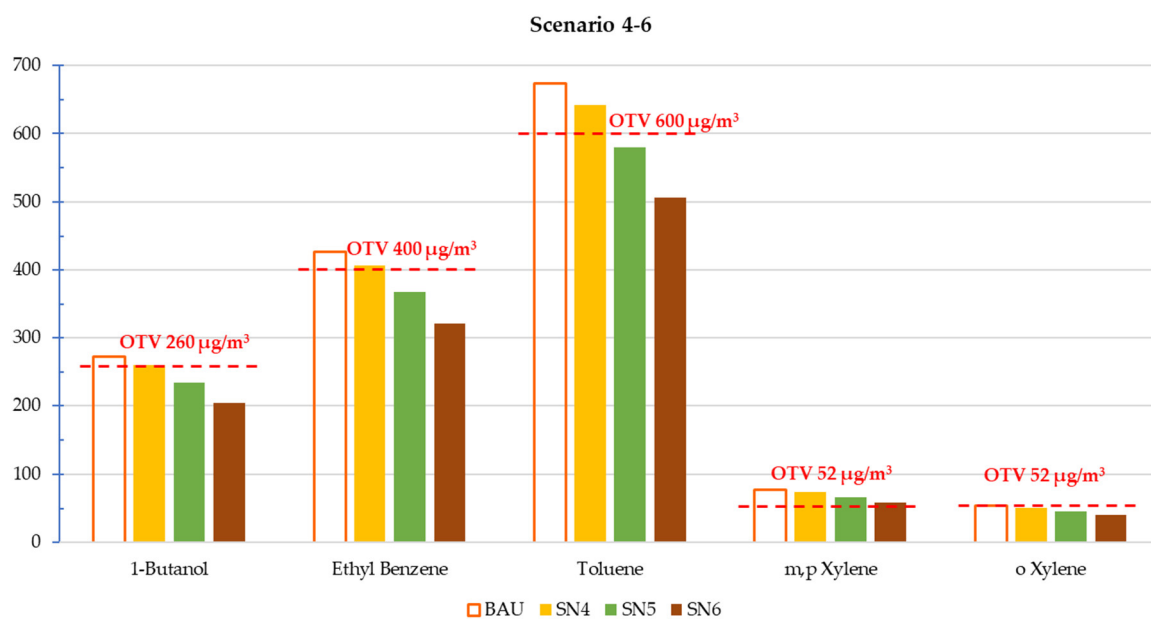

**Figure S2.** Peak concentration of target chemicals at the maximum ground level concentration (MGLC) after modification for Scenario 4 – 6.

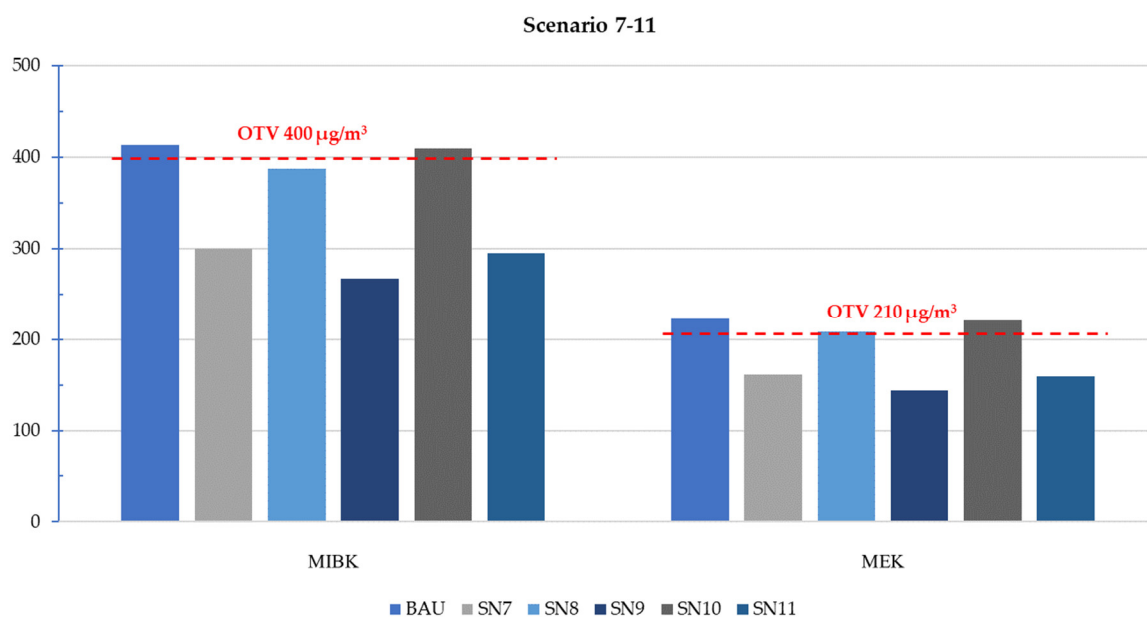

**Figure S3.** Peak concentration of target chemicals at the maximum ground level concentration (MGLC) after modification for Scenario 7 – 11.

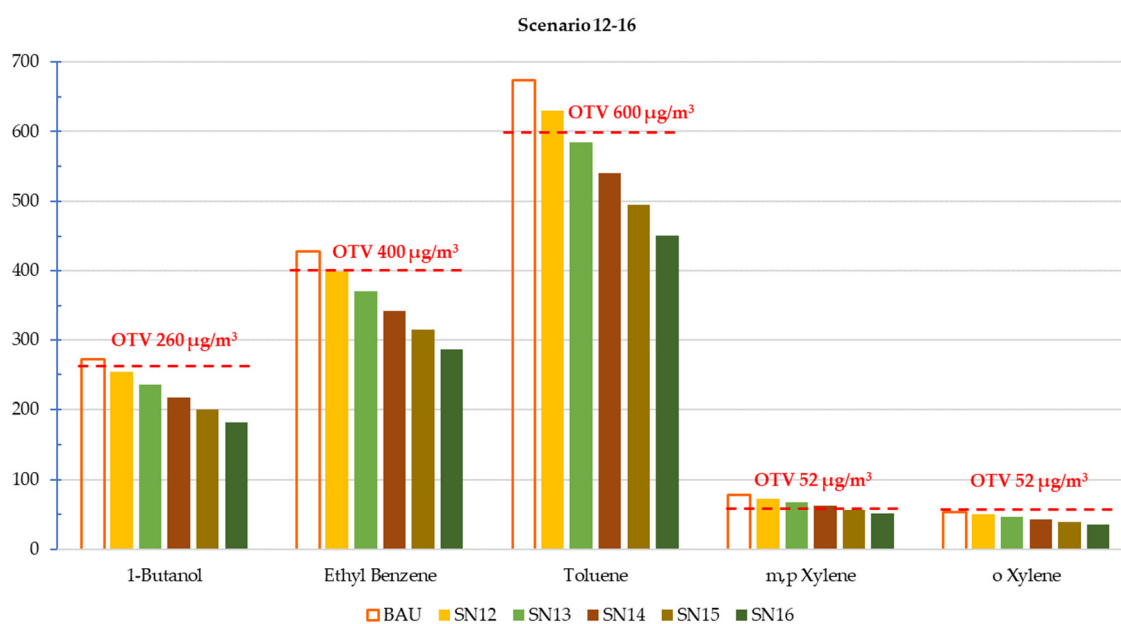

**Figure S4.** Peak concentration of target chemicals at the maximum ground level concentration (MGLC) after modification for Scenario 12 – 16.

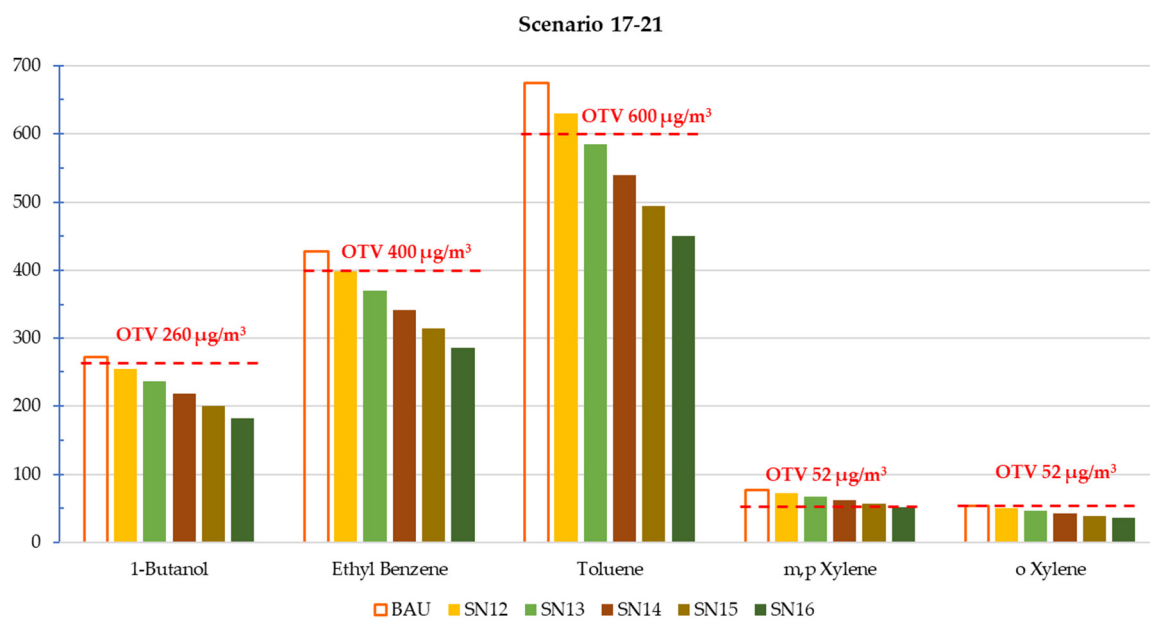

**Figure S5.** Peak concentration of target chemicals at the maximum ground level concentration (MGLC) after modification for Scenario 17 – 21.
